# Supplementary material for: Adaptation of a clinical reasoning model for use in inflammatory conditions of the lactating breast: a retrospective mixed-methods study
Source: PeerJ. 2022 Jul 25;10:e13627. doi: 10.7717/peerj.13627 (PMC9332403; doi:10.7717/peerj.13627)
Supplement: Supplemental Information 4 — The de-identified demographic data and ICLB linked factors collected in the retrospective clinical audit, which was used to calculate the counts and percentages in the adapted model. [file peerj-10-13627-s004.xlsx]

## Sheet: Coded data
record_id	maternal_age	infant_age	maternal_parity	number_of_children	cb_location	mode_of_delivery	induction	preterm_birth	TOTAL birth interventions	multiple_birth	traumatic_birth	first_contact_less_than_or_1hr	postal_decile_rank	high_ses	phi_ses	occupation	employed	education_level	health_service_access	income		nipple_injury	nipple_pain	nipple_creams	nipple_creams_other_type	nipple_patches	nipple_shields	TOTAL external nipple contacts	nipple_heteroplasia	nipple_heteroplasia_other	nipple_saureus	nipple_white_spot	nipple_thrush	nipple_not_reported		trauma_obstruct_tight_bra	trauma_obstruct_sleep_posn	trauma_obstruct_external_force	trauma_obstruct_other_external_compression	other_external_compression	TOTAL external compression	trauma_obstruc_wore_bra	trauma_obstruct_wore_bra_night	trauma_obstruct_self_massage	trauma_obstruct_firm_massagehandling	trauma_obstruct_not_reported		insuff_milkremov_attachm_difficult	insuff_milkremov_bf_difficult
1	35	4 wks	1	1	1	1	999	0	0	0	998	999	8	1	1	Lawyer	1	999	1	999		1	1	1		0	1	1	0		0	0	0	0		0	0	0	0		0	0	0	0	0	1		1	0
2	34	4 wks	2	2	999	1	999	0	0	0	0	999	999	0	1	NR	999	999	1	999		0	0	0		0	0	0	0		0	0	0	1		0	0	0	0		0	0	0	0	0	1		0	0
3	31	8 wks	2	2	999	1	999	0	0	0	999	999	10	1	1	Lawyer	1	999	1	999		0	0	0		0	0	0	0		0	0	0	1		1	0	0	0		1	1	0	1	0	0		1	0
4	37	12 wks	1	1	999	1	999	0	0	0	998	999	10	1	1	Graphic designer	1	999	1	999		0	0	0		0	0	0	0		0	0	0	1		0	0	0	0		0	0	0	0	0	1		1	0
5	36	12 wks	2	2	999	1	1	0	1	0	998	999	7	1	1	Operations Director	1	999	1	999		0	1	0		0	0	0	0		0	0	0	0		0	0	0	0		0	0	0	0	0	1		1	0
6	31	4.5 wks	1	1	999	2	996	0	1	0	998	999	10	1	1	Doctor	1	999	1	999		0	0	0		0	0	0	0		0	0	0	1		0	0	0	0		0	0	0	0	0	1		0	0
7	36	13 wks	2	2	999	999	999	0	0	0	999	999	10	1	998	Finance	1	999	1	999		0	1	0		0	0	0	0		0	0	1	0		0	0	0	0		0	0	0	0	0	1		0	0
8	30	8 days	1	1	1	1	999	0	0	0	998	999	10	1	998	PR Manager	1	999	1	999		0	0	0		0	0	0	0		0	0	0	1		0	0	0	1	underwire bra	1	1	0	1	0	0		0	0
9	33	4.5 mnths	1	1	2	1	999	0	0	0	998	999	10	1	1	Secondary teacher	1	999	1	999		0	0	0		0	0	0	0		0	0	0	1		0	0	0	0		0	0	0	0	0	1		0	0
10	37	2 mnths	1	1	999	2	999	0	1	0	999	999	9	1	998	Logistic manager	1	999	1	999		0	0	0		0	0	0	0		0	0	0	1		0	0	0	0		0	0	0	1	1	0		0	0
11	37	9.5 wks	2	2	999	999	999	0	0	0	999	999	7	1	998	Social worker	1	999	1	999		0	0	0		0	0	0	0		0	0	0	1		0	0	0	0		0	0	0	0	0	1		0	0
12	31	8 wks	1	1	1	1	999	0	0	0	998	999	7	1	1	Executive assistant	1	999	1	999		1	0	0		0	0	0	0		0	0	0	0		0	0	0	0		0	0	0	0	0	1		1	0
13	37	4 mnths	1	1	999	2	0	1	1	0	1	999	5	0	998	Social worker	1	999	1	999		0	0	0		0	0	0	0		0	0	0	1		0	0	0	0		0	0	0	1	0	1		0	0
14	33	7 wks	999	999	999	1	999	0	0	0	1	999	9	1	1	Project Manager	1	999	1	999		0	1	0		0	1	1	0		0	0	0	0		0	0	0	0		0	0	0	1	0	1		1	0
15	31	10 mnths	1	1	999	1	0	0	0	0	998	999	4	0	998	Retail manager	1	999	1	999		0	0	0		0	0	0	0		0	0	0	1		0	0	0	0		0	0	0	1	0	1		0	0
16	36	10 wks	2	2	999	999	999	0	0	0	999	999	2	0	1	(currently on mat leave)	999	999	1	999		0	1	1		0	0	0	0		0	1	0	0		0	0	0	0		0	0	0	0	0	1		0	0
17	39	9 mnths	2	2	999	1	999	0	0	0	998	999	4	0	998	NR	999	999	1	999		0	1	0		0	0	0	0		0	0	0	0		0	0	0	0		0	0	0	0	0	1		1	0
18	36	8 mnths	1	1	999	1	999	0	0	0	998	999	6	1	1	Social worker	1	999	1	999		0	0	0		0	0	0	0		0	0	0	1		0	0	0	0		0	0	0	0	0	1		0	0
19	38	23 wks	1	1	999	999	999	0	0	0	999	999	999	0	998	NR	999	999	1	999		0	0	0		0	0	0	0		0	0	0	1		0	0	0	0		0	0	0	0	0	1		0	0
20	33	3 wks	1	1	2	2	999	0	1	0	998	999	999	0	1	NR	999	999	1	999		1	0	0		0	0	0	0		0	0	0	0		0	0	0	0		0	0	0	0	0	1		0	0
21	29	7 wks	1	1	999	1	0	1	1	0	998	999	9	1	1	Midwife	1	999	1	999		0	0	0		0	0	0	0		0	0	0	1		1	0	0	1	baby's hand	1	1	0	1	0	0		1	0
22	31	12 wks	1	1	999	1	999	0	0	0	0	999	999	0	998	NR	999	999	1	999		1	1	1		1	0	1	0		0	0	0	0		0	0	0	0		0	0	0	0	0	1		0	0
23	31	6 wks	1	1	999	2	999	0	1	0	998	999	10	1	998	Office work	1	999	1	999		0	0	0		0	1	1	1		0	0	0	0		0	0	0	0		0	1	0	1	0	1		0	0
24	34	13 days	2	3	999	1	999	0	0	0	0	999	9	1	1	Graphic designer	1	999	1	999		1	0	0		0	0	0	0		0	0	0	0		1	0	0	0		1	1	0	0	0	0		0	1
25	32	3 wks	1	1	1	1	999	0	0	0	0	999	10	1	1	NR	999	999	1	999		0	0	0		0	0	0	0		0	0	0	1		0	0	0	0		0	0	0	0	0	1		0	0
26	38	6 wks	2	3	999	1	999	0	0	0	998	999	10	1	1	General Manager	1	999	1	999		0	1	0		0	0	0	0		0	0	0	0		0	0	0	0		0	0	0	1	0	1		0	0
27	29	3 wks	1	1	1	1	1	0	1	0	998	999	10	1	1	Sales	1	999	1	999		0	0	0		0	1	1	0		0	0	0	0		0	0	0	0		0	0	0	0	0	1		1	0
28	31	1 wk	1	1	2	1	999	0	0	0	998	999	7	1	998	Banking	1	999	1	999		1	1	0		0	1	1	0		0	0	0	0		0	0	0	0		0	0	0	0	0	1		1	0
29	34	6 wks	1	1	1	2	999	0	1	0	999	999	10	1	1	IT Change Manager	1	999	1	999		0	0	0		0	0	0	0		0	0	0	1		0	0	0	0		0	0	0	1	0	1		0	0
30	30	10 wks	2	2	1	2	996	0	1	0	998	999	9	1	998	Editor	1	999	1	999		0	0	0		0	0	0	0		0	0	0	1		0	0	0	0		0	0	0	0	0	1		0	0
31	41	5.5 mnths	2	2	999	999	999	0	0	0	999	999	10	1	1	Comms manager	1	999	1	999		0	0	0		0	0	0	0		0	1	0	0		0	0	0	0		0	0	0	0	0	1		0	0
32	34	4 wks	1	1	999	1	1	0	1	0	0	999	9	1	1	Administration	1	999	1	999		0	0	0		1	1	1	1		0	0	0	0		0	0	0	0		0	0	0	0	0	1		1	0
33	35	9 mnths	999	999	999	999	999	0	0	0	999	999	10	1	998	Organisational Psychologist	1	999	1	999		0	1	0		0	1	1	0		0	0	0	0		0	0	0	0		0	0	0	0	0	1		0	0
34	30	4 wks	1	1	999	999	999	0	0	0	999	999	7	1	1	Graphic designer	1	999	1	999		1	0	0		0	0	0	0		0	0	0	0		1	0	0	0		1	1	0	0	0	0		0	0
35	25	2 wks	1	1	2	2	996	0	1	0	998	999	10	1	1	Student	0	999	1	999		1	0	1		0	0	0	0		0	0	0	0		0	0	0	0		0	0	0	1	0	1		1	0
36	37	5 mnths	1	1	999	999	999	0	0	0	999	999	8	1	998	NR	999	999	1	999		0	0	0		0	0	0	0		0	0	0	1		1	0	0	1	Walk with baby carrier	1	1	0	1	0	0		0	0
37	39	7 mnths	2	3	999	2	999	0	1	0	999	999	10	1	1	Accountant	1	999	1	999		0	0	0		0	1	1	0		0	0	0	0		0	0	0	0		0	0	0	0	0	1		0	0
38	32	3 wks	2	999	999	1	999	0	0	0	998	999	2	0	1	Social worker	1	999	1	999		0	0	0		0	0	0	0		0	0	0	1		0	0	0	0		0	0	0	0	0	1		0	0
39	35	13 days	2	999	2	999	999	0	0	0	999	999	9	1	998	NR	999	999	1	999		1	0	0		0	0	0	0		0	0	0	0		0	0	0	0		0	1	0	0	0	1		0	0
40	35	7 mnths	1	1	999	999	999	0	0	0	999	999	7	1	998	Pastry chef	1	999	1	999		0	0	0		0	0	0	0		0	0	0	1		0	0	0	0		0	0	0	0	0	1		0	0
41	38	3.5 wks	2	2	999	1	999	0	0	0	999	999	9	1	1	Heritage officer	1	999	1	999		0	0	0		0	0	0	0		0	0	0	1		0	0	0	0		0	0	0	0	0	1		0	0
42	40	9.5 wks	2	2	999	2	996	0	1	0	0	999	9	1	1	NR	999	999	1	999		0	0	0		0	0	0	0		0	0	0	1		0	0	1	0		1	0	0	0	1	0		0	0
43	37	7 wks	2	2	999	999	999	0	0	0	999	999	9	1	998	Health policy	1	999	1	999		1	0	0		0	0	0	0		0	0	0	0		0	0	1	1	Holding pump firmly	1	0	0	1	1	0		1	0
44	29	10 mnths	1	1	999	999	999	0	0	0	999	999	9	1	1	Social worker	1	999	1	999		0	0	0		0	0	0	0		0	0	1	1		0	0	0	0		0	0	0	0	0	1		0	0
45	31	3 wks	1	1	999	1	999	0	0	0	998	999	4	0	998	Marketing	1	999	1	999		0	0	0		0	0	0	0		0	0	0	1		1	0	1	0		1	0	1	1	1	0		0	0
46	36	9 mnths	1	1	999	999	999	0	0	0	999	999	3	0	1	Medical representative	1	999	1	999		0	1	1	steroid cream for bleb	0	0	0	0		0	1	0	0		0	0	0	0		0	0	0	0	0	1		0	0
47	40	3 mnths	2	2	999	2	996	0	1	0	998	999	9	1	1	Psychologist	1	999	1	999		0	0	0		0	0	0	0		0	0	0	0		0	0	0	0		0	0	0	0	0	1		0	0
48	31	4 wks	1	1	999	1	999	0	0	0	999	999	999	0	1	NR	999	999	1	999		1	1	0		0	1	1	1		0	0	0	0		0	0	0	1	on bassinet while trying to settle daughter	1	0	0	1	0	0		0	0
49	37	8 days	1	1	1	2	999	0	1	0	998	999	10	1	1	Public servent	1	999	1	999		1	1	0		0	1	1	0		0	0	0	0		0	0	1	0		1	1	0	0	1	0		1	0
50	26	5 wks	1	1	1	1	999	0	0	0	998	999	10	1	1	Event manager	1	999	1	999		0	1	1		0	1	1	1		0	0	0	0		0	0	0	0		0	0	0	0	0	1		0	0
51	37	10 wks	2	2	999	999	999	0	0	0	999	999	9	1	1	Product and project co-ordinator	1	999	1	999		1	1	0		1	1	1	0		0	0	0	0		0	0	0	0		0	0	0	0	0	1		1	0
52	38	10 wks	2	2	2	999	1	0	1	0	998	999	9	1	1	NR	999	999	1	999		0	0	0		0	0	0	0		0	0	0	1		0	0	0	0		0	0	0	1	0	1		0	0
53	32	16 mnths	1	1	999	1	1	0	1	0	998	999	9	1	1	Office manager	1	999	1	999		0	0	0		0	0	0	0		0	0	0	1		0	1	0	0		1	0	0	1	0	0		0	0
54	27	6 mnths	1	1	999	1	999	0	0	0	998	999	9	1	998	Auditor	1	999	1	999		0	1	0		0	0	0	0		0	0	0	0		0	0	0	0		0	0	0	0	0	1		1	0
55	40	6 wks	1	1	999	2	999	0	1	0	999	999	4	0	998	Executive assistant	1	999	1	999		0	1	0		0	0	0	0		0	0	0	0		0	0	0	0		0	0	0	1	0	1		1	1
56	34	20 mnths	2	2	999	999	999	0	0	0	999	999	4	0	1	Nurse - Midwife	1	999	1	999		0	0	0		0	0	0	0		0	0	0	1		0	0	0	1	wore a bra with underwire for first time	1	1	0	0	0	0		0	0
57	31	8 mnths	2	2	999	1	999	0	0	0	999	999	7	1	998	Public servent	1	999	1	999		0	0	0		0	0	0	0		0	0	0	1		0	0	0	0		0	0	0	0	0	1		1	0
58	34	1 wk	2	2	999	999	999	0	0	0	999	999	10	1	1	NR	999	999	1	999		0	0	0		0	0	0	1		0	0	0	1		0	0	0	0		0	0	0	0	0	1		1	0
59	30	10 wks	1	1	999	1	999	0	0	0	998	999	7	1	1	Public servent	1	999	1	999		0	0	1		0	0	0	0		0	0	1	0		0	0	0	0		0	0	0	0	0	1		0	0
60	33	14 wks	1	1	999	1	0	0	0	0	998	999	10	1	1	Graphic designer	1	999	1	999		1	1	0		0	0	0	0		0	0	0	0		0	0	0	0		0	0	0	0	0	1		0	0
61	30	5 mnths	1	1	999	1	999	0	0	0	998	999	10	1	1	Marketing	1	999	1	999		1	1	0		0	0	0	0		0	0	0	0		0	0	0	0		0	0	0	0	0	1		0	0
62	37	10 mnths	2	3	999	999	999	0	0	0	999	999	10	1	1	Mum	0	999	1	999		0	0	0		0	0	0	0		0	0	0	1		0	0	0	0		0	0	0	1	0	1		0	0
63	36	42 weeks	2	2	999	999	999	0	0	0	999	999	10	1	1	NR	999	999	1	999		1	1	0		0	0	0	0		0	0	0	0		0	0	0	0		0	0	0	0	0	1		1	0
64	35	5 wks	2	3	3	1	999	0	0	0	998	999	10	1	1	Business owner	1	999	1	999		0	0	0		0	0	0	0		0	0	0	1		0	0	0	0		0	0	0	0	1	0		0	0
65	32	5 wks	999	999	1	999	1	0	1	0	998	999	9	1	1	Program coodinator	1	999	1	999		1	1	1		0	1	1	0		0	0	1	0		0	0	0	0		0	0	0	1	1	0		1	0
66	31	7 wks	1	1	999	2	1	0	1	0	998	999	10	1	998	Buyer	1	999	1	999		1	0	0		0	0	0	0		0	0	0	0		0	0	0	0		0	0	0	1	0	1		0	0
67	39	4 days	2	2	2	1	1	0	0	0	998	999	9	1	1	Arts & Culture Coordinator	1	999	1	999		1	1	0		0	0	0	1		0	0	0	0		0	0	0	0		0	0	0	0	0	1		0	0
68	39	12 days	2	2	2	1	999	0	0	0	998	999	7	1	1	Doctor	1	999	1	999		1	1	0		0	0	0	0		0	0	0	0		0	0	0	0		0	0	0	0	0	1		1	0
69	32	10 wks	2	2	999	1	999	0	0	0	998	999	9	1	1	Social work	1	999	1	999		0	0	0		0	0	0	0		0	0	0	1		0	0	0	0		0	0	0	0	0	1		1	0
70	38	5 wks	1	1	999	1	999	0	0	0	998	999	9	1	1	IT project manager	1	999	1	999		0	0	0		0	0	0	0		0	0	0	1		0	0	0	0		0	0	0	1	0	1		0	0
71	36	4 wks	1	1	1	2	999	0	1	0	999	999	10	1	998	Architect	1	999	1	999		0	1	0		0	0	0	0		0	0	0	0		0	0	0	0		0	0	0	1	0	1		0	0
72	999	3 wks	1	1	999	999	999	0	0	0	999	999	999	0	1	Midwife	1	999	1	999		1	1	1		0	1	1	0		0	0	0	0		0	0	0	0		0	0	0	1	0	1		1	0
73	35	9 mnths	1	1	999	2	999	0	1	0	998	999	10	1	1	Lawyer	1	999	1	999		0	0	0		0	0	0	0		0	0	0	1		0	0	0	0		0	0	0	0	0	1		0	0
74	32	5.5 mnths	1	1	999	999	999	0	0	0	999	999	10	1	1	Lawyer	1	999	1	999		0	1	1		0	0	0	0		0	0	1	0		0	0	0	0		0	0	0	1	0	1		0	0
75	33	10 wks	1	1	999	1	1	0	1	0	998	999	999	0	1	Public servent	1	999	1	999		0	0	0		0	0	0	0		0	0	0	0		0	0	0	0		0	0	0	0	0	1		0	0
76	33	7 wks	2	2	999	999	999	0	0	0	999	999	7	1	1	Nurse	1	999	1	999		0	0	0		0	0	0	0		0	0	0	1		0	0	0	1	while co-sleeping	1	0	0	0	0	0		0	0
77	38	5 mnths	2	2	999	2	996	0	1	0	998	999	10	1	1	Lawyer	1	999	1	999		0	0	0		0	0	0	0		0	0	0	0		0	0	1	0		1	0	0	0	0	0		0	0
78	37	3 wks	2	2	999	2	996	0	1	0	998	999	8	1	1	Occupational Therapist	1	999	1	999		0	0	0		0	0	0	0		0	0	0	1		0	0	0	0		0	0	0	0	0	1		0	0
79	37	9 mnths	1	1	999	1	999	0	0	0	998	999	7	1	998	Health worker	1	999	1	999		0	1	0		0	0	0	0		0	0	0	0		0	0	0	0		0	0	0	0	0	1		0	0
80	29	4 wks	1	1	1	1	999	1	1	0	998	999	4	0	998	Nurse	1	999	1	999		1	1	1		0	1	1	1		0	1	1	0		0	0	0	0		0	0	0	1	1	0		1	0
81	38	12 mnths	2	3	999	999	999	0	0	0	999	999	9	1	1	Sales manager	1	999	1	999		0	0	0		0	0	0	0		0	0	0	1		0	0	0	0		0	0	0	0	0	1		0	0
82	38	11 mnths	2	2	999	999	999	0	0	0	999	999	7	1	998	Landscape Architect	1	999	1	999		0	1	1		0	0	0	0		0	0	1	0		0	0	0	0		0	0	0	0	0	1		1	0
83	30	14.5 wks	2	2	999	1	999	0	0	0	998	999	7	1	1	Speech Pathologist	1	999	1	999		0	0	0		0	0	0	0		0	0	0	1		0	0	0	0		0	0	0	0	0	1		0	0
84	32	6 wks	1	1	999	999	999	0	0	0	999	999	10	1	998	Project Manager	1	999	1	999		1	1	0		0	1	1	0		0	0	0	0		0	0	0	0		0	0	0	0	0	1		1	0
85	41	12 days	1	1	999	1	999	0	0	0	998	999	5	0	998	Social worker	1	999	1	999		1	0	1		1	0	1	0		0	0	0	0		0	0	0	1	baby sleeping on chest	1	0	0	1	1	0		1	0
86	37	6 mnths	2	2	999	999	999	0	0	0	999	999	10	1	1	Project Manager	1	999	1	999		0	0	0		0	0	0	0		0	0	0	1		0	0	0	0		0	0	0	1	0	1		0	0
87	36	6 mnths	1	1	999	1	1	0	1	0	998	999	9	1	998	Nutritionist	1	999	1	999		0	0	0		0	0	0	0		0	0	0	1		1	0	0	0		1	1	0	1	1	0		0	0
88	33	14 mnths	1	1	999	1	999	0	0	0	998	999	10	1	1	Mum	0	999	1	999		0	0	0		0	0	0	0		0	0	0	0		0	0	0	0		0	0	0	0	0	1		0	0
89	31	11 wks	1	1	999	1	0	0	0	0	998	999	4	0	998	HR Manager	1	999	1	999		1	0	0		0	0	0	1		0	0	0	0		0	0	0	0		0	0	0	1	0	1		0	0
90	33	2 wks	1	1	1	1	999	0	0	0	998	999	10	1	1	Marketing Manager	1	999	1	999		0	1	0		0	0	0	0		0	0	0	1		0	0	0	1	electric pump flange causing visible indentation	1	0	0	0	0	0		1	0
91	30	7 wks	1	1	1	1	999	0	0	0	998	999	3	0	1	Food technologist	1	999	1	999		0	0	0		0	0	0	0		0	0	0	1		0	0	0	0		0	0	0	0	0	1		0	0
92	36	4.5 mnths	1	1	2	1	999	0	0	0	998	999	9	1	1	Lawyer	1	999	1	999		0	0	0		0	0	0	0		0	0	0	1		0	0	0	0		0	0	0	0	0	1		0	0
93	38	4 mnths	1	1	999	2	996	0	1	0	998	999	999	0	1	NR	999	999	1	999		1	1	0		0	0	0	0		0	0	0	0		0	0	0	0		0	0	0	1	0	1		1	0
94	33	4 wks	2	2	999	1	999	0	0	0	998	999	8	1	998	Educator	1	999	1	999		0	0	0		0	0	0	1	horizontal fold - improper latch	0	0	0	0		0	0	0	0		0	0	0	1	0	1		1	0
95	39	4 mnths	2	3	999	2	996	0	1	0	998	999	10	1	1	Photographer	1	999	1	999		0	0	0		0	0	0	0		0	0	0	1		0	0	1	0		1	0	0	0	0	0		0	0
96	35	13 wks	1	1	999	1	1	0	1	0	998	999	10	1	1	Nurse	1	999	1	999		0	0	0		0	0	0	0		0	0	0	1		1	1	0	0		1	1	0	1	1	0		0	0
97	37	2.5 wks	2	2	999	1	999	0	0	0	998	999	10	1	1	Tax manager	1	999	1	999		0	1	1		1	1	1	0		0	0	0	0		0	0	0	0		0	0	0	0	0	1		1	0
98	999	10 days	2	2	1	1	0	0	0	0	998	999	10	1	1	Teacher	1	999	1	999		0	0	0		0	0	0	0		0	0	0	1		0	0	0	0		0	0	0	1	0	1		0	0
99	32	9.5 mnths	2	2	999	999	999	0	0	0	999	999	6	1	1	Teacher	1	999	1	999		0	0	0		0	0	0	0		0	0	0	1		0	0	0	0		0	0	0	0	0	1		0	0
100	33	6 wks	1	1	2	1	1	0	1	0	998	999	7	1	1	Psychologist	1	999	1	999		1	1	1		0	1	1	0		0	0	1	0		0	0	0	0		0	0	0	0	0	1		1	0
101	37	2 mnths	1	1	999	1	999	0	0	0	998	999	10	1	1	Communications	1	999	1	999		0	0	0		0	0	0	0		0	1	0	0		0	0	0	0		0	0	0	1	0	1		0	0
102	28	3 wks	1	1	2	2	996	0	1	0	998	999	7	1	1	Chef	1	999	1	999		0	0	0		0	0	0	1		0	0	0	1		0	0	0	0		0	0	0	0	0	1		1	0
103	38	16 mnths	2	2	999	1	999	0	0	0	998	999	7	1	1	Accountant	1	999	1	999		0	0	0		0	0	0	0		0	0	0	1		0	0	0	0		0	0	0	1	0	1		0	0
104	32	4.5 wks	1	1	999	1	999	0	0	0	998	999	2	0	998	Physio	1	999	1	999		0	1	0		0	0	0	0		0	0	0	0		0	0	0	0		0	0	0	1	0	1		0	0
105	30	9 wks	2	2	999	999	999	0	0	0	999	999	3	0	1	Orthoptist	1	999	1	999		0	0	0		0	0	0	0		0	0	0	1		0	0	0	0		0	0	0	1	0	1		0	0
106	36	7 mnths	2	2	999	1	0	0	0	0	998	999	10	1	1	Sales	1	999	1	999		0	0	0		0	0	0	0		0	0	0	1		0	0	0	0		0	0	0	0	0	1		0	0
107	37	8.5-9 mnths	2	2	999	2	999	0	1	0	998	999	10	1	998	Operations Manager	1	999	1	999		0	0	0		0	0	0	0		0	0	0	1		0	0	0	1	underwire bra	1	1	0	0	0	0		0	0
108	33	8 wks	1	1	999	2	1	0	1	0	0	999	9	1	998	Curator	1	999	1	999		1	0	0		0	1	1	0		0	0	0	0		0	0	0	0		0	0	0	0	0	1		0	0
109	31	8 wks	999	999	999	1	999	0	0	0	0	999	7	1	1	Social worker	1	999	1	999		0	1	0		0	0	0	0		0	0	0	0		0	0	0	0		0	0	0	1	1	0		0	0
110	31	12 wks	1	1	2	1	0	0	0	0	998	999	9	1	1	Shoe designer	1	999	1	999		0	0	0		0	0	0	0		0	0	0	1		1	0	0	0		1	0	0	0	0	0		1	0
111	28	2.5 wks	2	2	999	1	999	0	0	0	998	1	4	0	1	Stay at home mum	0	999	1	999		0	0	0		0	0	0	0		0	0	0	1		0	0	0	0		0	0	0	0	0	1		0	0
112	29	13 mnths	1	1	999	1	999	0	0	0	999	999	7	1	1	Nutritionist/ Engagement Officer	1	999	1	999		0	0	0		0	0	0	0		0	0	0	1		0	0	0	0		0	0	0	0	0	1		0	0
113	39	3.5 mnths	2	2	999	999	999	0	0	0	999	999	7	1	998	Nurse	1	999	1	999		0	0	0		0	0	0	0		0	0	0	1		0	0	0	0		0	0	0	1	1	0		1	0
114	33	4 mnths	1	1	999	1	0	0	0	0	998	999	10	1	1	NR	999	999	1	999		0	0	0		0	0	0	0		0	0	0	1		0	0	0	0		0	0	0	0	0	1		0	0
115	31	10 days	1	1	999	999	999	0	0	0	999	999	4	0	998	Researcher	0	999	1	999		1	0	1		0	0	0	0		0	0	0	0		0	0	0	0		0	0	0	0	0	1		1	0
116	30	5 mnths	1	1	999	1	999	0	0	0	998	999	9	1	998	Geriatrician	1	999	1	999		0	0	0		0	1	1	0		0	0	0	0		0	0	0	0		0	0	0	1	1	0		1	0
117	35	14 mnths	1	1	999	1	999	0	0	0	998	999	10	1	1	Product Manager	1	999	1	999		0	0	0		0	0	0	0		0	0	0	1		0	0	0	0		0	0	0	0	0	1		0	0
118	35	4 wks	2	2	999	1	999	1	1	0	998	999	10	1	1	Doctor	1	999	1	999		1	0	0		0	0	0	0		0	0	0	0		0	0	0	0		0	0	0	0	0	1		1	0
119	31	11 wks	1	1	999	1	999	0	0	0	998	1	10	1	1	Paediatrician	1	999	1	999		0	0	0		0	0	0	0		0	0	0	1		0	0	0	0		0	0	0	0	0	1		0	0
120	42	22 wks	1	1	999	2	996	0	1	0	998	999	10	1	1	Marketing	1	999	1	999		0	0	0		0	0	0	0		0	0	0	1		0	0	0	0		0	0	0	0	1	0		0	0
121	35	6 wks	2	2	999	999	999	0	0	0	999	999	2	0	998	Child Protection Coordinator	1	999	1	999		0	0	0		0	0	0	0		0	0	0	1		1	0	0	0		1	1	0	0	0	0		0	0
122	28	9 days	2	2	999	1	0	0	0	0	998	999	10	1	1	Admin	1	999	1	999		1	1	0		0	0	0	0		0	0	0	0		1	0	0	0		1	1	0	0	0	0		0	0
123	31	4 wks	2	2	999	1	999	0	0	0	0	1	8	1	1	Teacher	1	999	1	999		0	0	0		0	0	0	0		0	0	0	1		0	0	0	0		0	0	0	0	0	1		1	0
124	36	4 wks	1	1	999	2	996	0	1	0	998	999	7	1	998	Teacher	1	999	1	999		1	1	0		0	1	1	0		0	0	0	0		0	0	0	0		0	0	0	1	1	0		0	0
125	29	3 mnths	1	1	999	1	999	0	0	0	998	999	7	1	998	PhD Student	0	999	1	999		0	0	0		0	0	0	0		0	0	0	1		1	0	0	0		1	1	0	0	0	0		0	0
126	39	7 wks	2	2	999	1	999	0	0	0	999	999	10	1	998	Piano teacher	1	999	1	999		0	0	0		0	0	0	0		0	0	0	1		0	0	0	0		0	0	0	0	0	1		0	0
127	32	6 wks	1	1	999	1	999	0	0	0	998	999	10	1	1	Dietician	1	999	1	999		1	1	1		0	0	0	0		0	0	1	0		0	0	0	0		0	0	0	1	1	0		0	0
128	37	1 yr	999	999	999	999	999	0	0	0	999	999	9	1	1	Physiotherapist	1	999	1	999		0	0	0		0	0	0	0		0	0	0	1		0	0	0	0		0	0	0	0	0	1		0	0
129	40	6 mnths	2	2	999	1	1	0	1	0	998	999	9	1	1	Project coordinator	1	999	1	999		0	0	0		0	0	0	0		0	0	0	1		0	0	0	0		0	0	0	0	0	1		0	0
130	39	3 mnths	2	2	999	2	996	0	1	0	998	999	7	1	1	Lawyer	1	999	1	999		0	1	0		0	0	0	0		0	0	0	0		0	0	0	0		0	0	0	0	0	1		0	0
131	32	6 wks	999	999	999	2	996	0	1	0	0	999	9	1	1	NR	999	999	1	999		1	1	1		0	1	1	0		0	0	1	0		0	0	0	0		0	0	0	0	0	1		0	0
132	33	10 wks	1	1	999	2	1	0	1	0	0	1	10	1	998	Occupational Therapist	1	999	1	999		1	0	0		0	0	0	0		0	0	0	0		0	0	0	0		0	0	0	0	0	1		0	0
133	39	11.5 wks	1	1	2	1	999	0	0	0	998	999	7	1	1	Vet	1	999	1	999		1	1	0		0	1	1	0		0	0	0	0		0	0	0	0		0	0	0	0	0	1		0	0
134	35	8 mnths	2	2	999	1	999	0	0	0	998	999	10	1	1	Doctor	1	999	1	999		0	0	0		0	0	0	0		0	0	0	1		0	0	0	0		0	0	0	0	0	1		0	0
135	34	4.5 mnths	1	1	999	2	996	0	1	0	998	999	10	1	1	Real estate	1	999	1	999		0	0	0		0	0	0	0		0	0	0	1		0	0	0	0		0	0	0	0	0	1		0	0
136	36	3 wks	2	2	999	1	999	0	0	0	998	1	9	1	998	Landscape Architect	1	999	1	999		1	1	0		0	0	0	0		0	0	0	0		0	0	0	0		0	0	0	0	0	1		0	0
137	31	2 wks	1	1	999	1	999	0	0	0	998	1	7	1	1	Physiotherapist	1	999	1	999		1	1	0		0	0	0	0		0	0	0	0		0	0	0	0		0	0	0	1	1	0		0	0
138	40	6 wks	2	2	999	1	1	0	1	0	998	999	10	1	1	General Manager	1	999	1	999		0	0	0		0	0	0	0		0	0	0	1		0	0	0	0		0	0	0	1	0	1		0	0
139	36	4.5 mnths	1	1	999	2	996	0	1	0	998	999	8	1	1	Scientist	1	999	1	999		0	0	0		0	0	0	0		0	1	0	1		0	0	0	0		0	0	0	0	0	1		0	0
140	40	3 wks	2	2	999	1	0	0	0	0	998	1	9	1	1	Occupational Therapist	1	999	1	999		0	0	0		0	0	0	0		0	0	0	1		0	0	0	0		0		1	1	0	1		0	0
141	36	2 wks	2	2	999	1	1	0	1	0	998	999	2	0	1	Art curator	1	999	1	999		0	1	1	Topical kenacomb ointment	0	0	0	0		0	0	0	0		0	0	0	0		0	0	0	0	0	1		0	0
142	36	7 mnths	1	1	999	2	1	0	1	0	0	999	10	1	1	Lawyer	1	999	1	999		0	0	0		0	0	0	0		0	0	0	1		0	0	0	0		0	0	0	0	0	1		0	0
143	38	3.5 mnths	2	2	999	2	996	0	1	0	998	999	9	1	1	Accountant	1	999	1	999		0	0	0		0	0	0	0		0	0	0	1		0	0	0	0		0	0	0	0	0	1		0	0
144	35	8 wks	2	2	999	1	999	0	0	0	0	999	10	1	998	Medical affairs	1	999	1	999		0	0	0		0	0	0	0		0	0	0	1		0	0	0	0		0	0	0	1	0	1		0	0
145	28	5 wks	1	1	999	1	999	0	0	0	998	1	4	0	1	Marketing specialist	1	999	1	999		0	0	1		0	0	0	0		0	0	0	0		0	0	0	0		0	0	0	0	0	1		0	0
146	38	8 wks	2	2	999	1	999	1	1	0	0	999	10	1	1	Consultant	1	999	1	999		0	0	0		0	0	0	0		0	0	0	1		0	0	0	0		0	0	0	0	0	1		0	0
147	34	4 mnths	1	1	1	1	999	0	0	0	998	1	10	1	1	Doctor	1	999	1	999		0	1	0		0	0	0	0		0	0	0	0		0	0	0	0		0	0	0	0	0	1		0	0
148	35	4 mnths	999	999	999	1	999	0	0	0	998	999	9	1	998	Childcare	1	999	1	999		1	0	0		0	0	0	0		0	0	0	0		0	0	0	0		0	0	0	0	1	0		0	0
149	36	2 wks	1	1	2	2	999	0	1	0	999	999	9	1	998	Accountant	1	999	1	999		1	0	0		1	1	1	0		0	0	0	0		0	0	0	0		0	0	0	1	0	1		1	0
150	36	3 wks	2	2	1	1	999	0	0	0	0	999	4	0	1	Physio	1	999	1	999		0	0	0		0	0	0	0		0	0	0	1		0	0	0	0		0	0	0	1	0	1		0	0
151	31	5 mnths	1	1	999	2	996	1	1	0	998	999	9	1	1	Engineer	1	999	1	999		0	0	0		0	0	0	0		0	0	0	1		0	0	0	0		0	0	0	1	1	0		0	0
152	37	14 mnths	2	3	999	1	999	0	0	0	0	999	10	1	1	Veterinarian	1	999	1	999		0	0	0		0	0	0	0		0	0	0	1		0	0	0	0		0	0	0	0	0	1		0	0
153	31	3 wks	1	1	999	1	999	0	0	0	998	999	10	1	1	Public servent	1	999	1	999		0	1	0		0	0	0	0		0	0	0	0		0	0	0	0		0	0	0	0	0	1		0	0
154	36	21 mnths	2	2	999	2	996	0	1	0	998	999	10	1	1	Mother	0	999	1	999		0	0	0		0	0	0	0		0	1	0	0		0	0	0	0		0	0	0	0	0	1		0	0
155	29	6 wks	2	2	2	1	999	1	1	0	998	999	3	0	1	Doctor	1	999	1	999		0	0	0		0	0	0	0		0	0	0	1		0	0	0	0		0	0	0	0	0	1		0	0
156	38	6 mnths	2	2	3	1	0	0	0	0	998	999	7	1	998	Designer - graphics	1	999	1	999		0	1	0		0	0	0	0		0	0	0	0		1	0	0	0		1	1	0	0	0	0		0	0
157	37	6 days	1	1	1	1	1	0	1	0	998	1	7	1	998	Social worker	1	999	1	999		0	0	0		0	0	0	0		0	0	0	1		0	0	0	0		0	0	0	0	0	1		1	0
158	35	7 wks	1	1	1	1	999	0	0	0	998	999	9	1	998	Jeweller	1	999	1	999		1	0	0		0	1	1	0		0	0	0	0		1	0	0	0		1	1	0	1	1	0		1	0
159	35	6 mnths	2	2	999	2	999	0	1	0	999	999	10	1	1	Associate Professor	1	999	1	999		0	0	0		0	0	0	0		0	0	0	0		0	0	0	0		0	0	0	0	0	1		0	0
160	32	4 mnths	1	1	999	2	999	0	1	0	998	999	7	1	1	Graphic designer	1	999	1	999		0	0	0		0	0	0	0		0	0	0	0		0	0	0	0		0	0	0	0	1	0		1	0
TOTALS									56					130								41	48	20				27	10		0	7	10								27
[truncated: 102 more columns]

## Sheet: Variable dictionary
Variable / Field Name	Form Name	Field Type	Field Label	Choices, Calculations, OR Slider Labels
record_id	demographics	text	Record ID
maternal_age	demographics	text	Maternal age
infant_age	demographics	text	Infant age
maternal_parity	demographics	dropdown	Maternal parity	1, Primiparity | 2, Multiparity | 999, Not reported
number_of_children	demographics	dropdown	Number of children (given birth to)	2, 2 | 3, 3 | 4, 4 | 5, 5 | 6, 6 | 7, Other | 999, Not reported
cb_location	demographics	dropdown	Childbirth location	1, Public hospital | 2, Private | 3, Home birth | 999, Not reported
mode_of_delivery	demographics	dropdown	Mode of childbirth delivery	1, Vaginal | 2, Caesarean | 999, Not reported
induction	demographics	dropdown	Induction of labour?	0, No | 1, Yes | 999, Not reported | 996, Not applicable
preterm_ birth	demographics	dropdown	Preterm birth	0, No / Not reported | 1, Yes
TOTAL birth interventions	(calculated field for categorisation)
multiple_birth	demographics	dropdown	Multiple birth (e.g. Twins, triplets)	0, No | 1, Yes | 998, Unable to determine
traumatic_birth	demographics	dropdown	Traumatic birth?	0, No | 1, Yes | 999, Not reported | 998, Unable to determine
first_contact_less_than_or_1 hr	demographics	dropdown	First contact with child ≤1hr	1, Yes | 999, Not reported
postal_decile_rank	demographics	calculation	Postcode decile ranking	1, Most disadvantaged | 10, Most advantaged | 999, Not reported
high_SES	demographics	calculation	High SES	1, Yes | 2, No
phi_ses	demographics	dropdown	Private health insurance?	1, Yes I 998, Unable to determine
occupation	demographics	text	Maternal occupation	(NR = Not reported)
employed	demographics	calculation	Employed?	1, Yes | 0, Not currently | 999, Not reported
education_level	demographics	dropdown	Education level	1, High school | 2, Certificate level I - III | 3, Certficate level IV | 4, Diploma | 5, Bachelor degree or above | 999, Not reported
health_service_access	demographics	dropdown	Health service access for ICLB	1, Private
income	demographics	dropdown	Income	999, Unknown
nipple_injury	associated_factors	dropdown	Nipple injury (ie. cracked/damaged)	0, No / Not reported | 1, Yes
nipple_pain	associated_factors	dropdown	Nipple pain	0, No / Not reported | 1, Yes
nipple_creams	associated_factors	dropdown	Topical nipple creams (e.g. antifungals, Lansinoh)	0, No / Not reported | 1, Yes
nipple_creams_other_type	associated_factors	text	Topical nipple creams other - Type
nipple_patches	associated_factors	dropdown	Nipple dressings/patches (e.g. Hydrogel)	0, No / Not reported | 1, Yes
nipple_shields	associated_factors	dropdown	Nipple shields(s)	0, No / Not reported | 1, Yes
Total external nipple contacts	(calculated field for categorisation)
nipple_heteroplasia	associated_factors	dropdown	Nipple anatomical variations (e.g. retraction/inversion, short or wide)	0, No / Not reported | 1, Yes
nipple_heteroplasia_other	associated_factors	text	Nipple anatomical variations - Other
nipple_saureus	associated_factors	dropdown	S.aureus isolated from nipple	0, No / Not reported | 1, Yes
nipple_white_spot	associated_factors	dropdown	White spot/milk bleb	0, No / Not reported | 1, Yes
nipple_thrush	associated_factors	dropdown	Nipple thursh	0, No / Not reported | 1, Yes
nipple_not reported	associated_factors	dropdown	Nipple factors not reported	0, No | 1, Yes
trauma_obstruct_tight bra	associated_factors	dropdown	Tight bra	0, No / Not reported | 1, Yes
trauma_obstruct_sleep_posn	associated_factors	dropdown	Sleeping position - lateral, supine	0, No / Not reported | 1, Yes
trauma_obstruct_external force	associated_factors	dropdown	External force (e.g. baby kick)	0, No / Not reported | 1, Yes
trauma_obstruct_other_external_compression	associated_factors	dropdown	Other external compression	0, No / Not reported | 1, Yes
other_external_compression	associated_factors	text	Other extenral compression - specify
TOTAL external compression	(calculated field for categorisation)
trauma_obstruct_wore_bra	associated_factors	dropdown	Wore a bra	0, No / Not reported | 1, Yes
trauma_obstruct_wore_bra_night	associated_factors	dropdown	Wore bra at night	0, No / Not reported | 1, Yes
trauma_obstruct_self_massage	associated_factors	dropdown	Non-medical staff massage	0, No / Not reported | 1, Yes
trauma_obstruct_firm_massagehandling	associated_factors	dropdown	Firm massage/handling	0, No / Not reported | 1, Yes
trauma_obstruct_not_reported	associated_factors	dropdown	Breast trauma/obstruction factors not reported	0, No | 1, Yes
insuff_milkremov_attachm_difficult	associated_factors	dropdown	Attachment difficulties	0, No / Not reported | 1, Yes
insuff_milkremov_bf_difficult	associated_factors	dropdown	Breastfeeding difficulty	0, No / Not reported | 1, Yes
insuff_milkremov_nipple_areola_sucking	associated_factors	dropdown	Nipple or areola sucking	0, No / Not reported | 1, Yes
TOTAL fit & hold difficulty	(calculated field for categorisation)
insuff_milkremov_decreased_milk_removal	associated_factors	dropdown	Decreased milk removal?	0, No / Not reported | 1, Yes
decreased_milk_removal_type	associated_factors	dropdown	Decreased milk removal - type	1, Missed a feed (or EBM) | 2, Longer interval between feeds (or EBM) | 3, Other
decreased_milk_removal_type_other	associated_factors	text	Decreased milk removal - type Other
insuff_milkremov_wean	associated_factors	dropdown	Tried to wean/weaning	0, No / Not reported | 1, Yes
TOTAL decreased milk transfer	(calculated field for categorisation)
insuff_milkremov_not_reported	associated_factors	dropdown	Insufficient milk removal not reported	0, No | 1, Yes
maternal_pump	associated_factors	dropdown	Maternal breast pump use/expressing breast milk	0, No / Not reported | 1, Yes
maternal_stress	associated_factors	dropdown	Psychological stress	0, No / Not reported | 1, Yes
maternal_bm_after_24hrs	associated_factors	dropdown	Breast milk came in > 24 hr	0, No / Not reported | 1, Yes
maternal_low_supply	associated_factors	dropdown	Low milk supply	0, No / Not reported | 1, Yes
maternal_high_supply	associated_factors	dropdown	Over milk supply	0, No / Not reported | 1, Yes
maternal_phx_iclb_this_lactation	associated_factors	dropdown	PHx mastitis or ICLB (this lactation period)	0, No / Not reported | 1, Yes
maternal_phx_iclb_prev_lactation	associated_factors	dropdown	PHx mastitis or ICLB (previous lactation period)	0, No / Not reported | 1, Yes
maternal_family_hx_iclb	associated_factors	dropdown	Familial history of mastitis	0, No | 1, Yes | 999, Not reported
Total PHx ICLB	(calculated field for categorisation)
maternal_throat_infection	associated_factors	dropdown	Throat infection	0, No / Not reported | 1, Yes
maternal_other_infection	associated_factors	dropdown	Maternal other infection	0, No / Not reported | 1, Yes
maternal_other_infection_type	associated_factors	text	Maternal other infection - type
TOTAL maternal infection	(calculated field for categorisation)
maternal_fatigue	associated_factors	dropdown	Maternal fatigue	0, No / Not reported | 1, Yes
maternal_anxiety_depression	associated_factors	dropdown	Maternal anxiety and/or depression	0, No / Not reported | 1, Yes
maternal_psychological_mood	associated_factors	dropdown	Negative psychological mood	0, No / Not reported | 1, Yes
maternal_anaemia	associated_factors	dropdown	Anaemia	0, No / Not reported | 1, Yes
maternal_abs_iclb	associated_factors	dropdown	Oral antibiotics during BF, reason: this ICLB	0, No / Not reported | 1, Yes
maternal_abs_other	associated_factors	dropdown	Oral antibiotics during BF, reason: other	0, No / Not reported | 1, Yes
TOTAL maternal antibiotic use	(calculated field for categorisation)
maternal_saureus	associated_factors	dropdown	S. aureus isolated from breast milk	0, No / Not reported | 1, Yes
maternal_child_separated>24hr	associated_factors	dropdown	Separated from child > 24 hr	0, No / Not reported | 1, Yes
maternal_menses	associated_factors	dropdown	Menses returned	0, No / Not reported | 1, Yes
maternal_smoker	associated_factors	dropdown	Smoker	0, No / Not reported | 1, Yes
maternal_phx_sex_abuse	associated_factors	dropdown	PHx childhood sexual abuse	0, No / Not reported | 1, Yes
maternal_breast_surgery	associated_factors	dropdown	Breast surgery	0, No / Not reported | 1, Yes
maternal_nonlact_breast_complications	associated_factors	dropdown	PHx non-lactational breast complications	0, No / Not reported | 1, Yes
non-lact_breast_complications_type	associated_factors	text	Non-lactational breast complications - Type
TOTAL PHx non-lactational breast complications	(calculated field for categorisation)
maternal_prev_bad_bf_experience	associated_factors	dropdown	Previous bad breatfeeding experience	0, No / Not reported | 1, Yes
maternal_clean_nipple	associated_factors	dropdown	Maternal clean nipple before breastfeeding	0, No / Not reported | 1, Yes
maternal_not_reported	associated_factors	dropdown	Maternal factors not related	0, No | 1, Yes
bf_behaviour_lying_down	associated_factors	dropdown	Breastfeeding positon - lying down	0, No / Not reported | 1, Yes
bf_behaviour_consecutive_breast	associated_factors	dropdown	Breastfeeding consecutive same breast	0, No / Not reported | 1, Yes
bf_behaviour_feeding_less_6xday	associated_factors	dropdown	Feeding < 6 times/day	0, No / Not reported | 1, Yes
bf_behaviour_feeding_6-9xday	associated_factors	dropdown	Feeding 6-9 times/day	0, No / Not reported | 1, Yes
bf_behaviour_more_freq_48hrs	associated_factors	dropdown	Feeding more frequently in 48 hr before mastitis onset	0, No / Not reported | 1, Yes
bf_behaviour_duration>30min	associated_factors	dropdown	Breastfeeding duration > 30mins	0, No / Not reported | 1, Yes
bf_behaviour_sleep_with_sucking	associated_factors	dropdown	Sleep with sucking	0, No / Not reported | 1, Yes
bf_behaviour_change	associated_factors	dropdown	Variable behaviour/ change in regime	0, No / Not reported | 1, Yes
bf_behaviour_change_type	associated_factors	text	Variable behaviour/ change in regime - Type
TOTAL breastfeeding behviour & practices	(calculated field for categorisation)
bf_behaviour_h20_first_month	associated_factors	dropdown	H20 first month	0, No / Not reported | 1, Yes
bf_behaviour_prelacteal_feeding	associated_factors	dropdown	Prelacteal feeding	0, No / Not reported | 1, Yes
bf_behaviour_not_reported	associated_factors	dropdown	Breastfeeding behaviour factors not reported	0, No | 1, Yes
breast_condit_blocked_ducts	associated_factors	dropdown	Breast condition - Blocked ducts	0, No / Not reported | 1, Yes
breast_condit_engorgement	associated_factors	dropdown	Breast condition - Engorgement	0, No / Not reported | 1, Yes
breast_condit_bf_pain	associated_factors	dropdown	Breast condition - Breastfeeding pain	0, No / Not reported | 1, Yes
breast_condit_not_reported	associated_factors	dropdown	Breast condition factors not reported	0, No | 1, Yes
infant_throat_infection	associated_factors	dropdown	Infant throat infection	0, No / Not reported | 1, Yes
infant_runny_nose	associated_factors	dropdown	Infant runny nose	0, No / Not reported | 1, Yes
infant_oral thrush	associated_factors	dropdown	Infant oral thrush	0, No / Not reported | 1, Yes
infant_other_ill_health	associated_factors	dropdown	Infant other ill health	0, No / Not reported | 1, Yes
other_ill_health	associated_factors	text	Infant other ill health - specify
TOTAL ill health	(calculated field for categorisation)
infant_sucks_thumb	associated_factors	dropdown	Infant sucks thumb	0, No / Not reported | 1, Yes
infant_pacifier	associated_factors	dropdown	Infant pacifier	0, No / Not reported | 1, Yes
infant_bw_3500_or_less	associated_factors	dropdown	Infant birthweight ≤3500 gms	0, No / Not reported | 1, Yes
infant_saureus	associated_factors	dropdown	S. aureus isolated from infant	0, No / Not reported | 1, Yes
infant_tongue_tie	associated_factors	dropdown	Infant tongue tie (currently)	0, No / Not reported | 1, Yes
infant_other_oral_anomaly	associated_factors	dropdown	Infant other oral anomaly	0, No / Not reported | 1, Yes
other_oral_anomaly_type	associated_factors	text	Infant other oral anomaly - Type
TOTAL infant oral anomaly	(calculated field for categorisation)
infant_prem	associated_factors	dropdown	Infant born premature	0, No / Not reported | 1, Yes
infant_formula	associated_factors	dropdown	Infant supplemented with formula	0, No / Not reported | 1, Yes
infant_not_reported	associated_factors	dropdown	Infant factors not reported	0, No | 1, Yes
TOTAL number of associated factors	(calculated field for categorisation)
